# Supplementary material for: Salt Stress Induces non-CG Methylation in Coding Regions of Barley Seedlings (<em>Hordeum vulgare</em>)
Source: Preprints.org preprint supplement (doi:10.20944/preprints201804.0323.v1), 2018-04-25
Supplement: Supplementary file 4 [file Supplemental_Dataset_S4_Annotation_root_DEgenes.xlsx]

## Sheet: Info
Supplemental Data Set S4. List and annotation of salt induced DE genes and differentially methylated DE genes in roots of Clipper and LR Sahara.
Title: Methylation-sensitive GBS reveals non-CG methylation in gene-body induced by salt stress in barley seedlings (Hordeum vulgare)
Moumouni Konate1, Mike J. Wilkinson2, Benjamin T. Mayne3, Stephen M. Pederson4, Eileen S. Scott5, Bettina Berger5, 6, Carlos Marcelino Rodriguez Lopez7*
1Institut de l'Environnement et de Recherches Agricoles (INERA), Station de Farako-Ba, 01 BP 910 Bobo-Dioulasso 01, Burkina Faso; email: mouni.konate@gmail.com.
2Pwllpeiran Upland Research Centre, Institute of Biological, Environmental and Rural Sciences, Penglais Campus, Aberystwyth, Ceredigion, SY23 3FG, UK.
3Robinson Research Institute, School of Medicine, The University of Adelaide, SA 5005 Australia
4Bioinformatics Hub, The University of Adelaide, The University of Adelaide, SA 5005 Australia
5School of Agriculture, Food and Wine, The University of Adelaide, Waite Campus, PMB 1, Glen Osmond, SA 5064, Australia
6The Plant Accelerator, Australian Plant Phenomics Facility, Waite Campus, The University of Adelaide, SA 5064, Australia
7Environmental Epigenetics & Genetics Group; School of Agriculture, Food & Wine; The University of Adelaide, Waite Campus, PMB 1, Glen Osmond, SA 5064, Australia
*Corresponding author: Carlos M Rodriguez Lopez, carlos.rodriguezlopez@adelaide.edu.au, Phone: +61 8 8313 0774
Present address: Environmental Epigenetics & Genetics Group; School of Agriculture, Food & Wine; The University of Adelaide, Waite Campus, PMB 1, Glen Osmond, SA 5064, Australia

## Sheet: DEgenes_roots
List of differentially expressed genes in barley roots in response to salt stress (100 mM NaCl)
GeneID	Ref. GeneID	Chr	Start	End	logFC	AveExpr	t	P.Value	adj.P.Val
MSTRG.14676		3H	58248883	58253432	3.28844	4.09727	12.6476	1.12e-09	3.42e-05
MSTRG.12231		2H	601501169	601502106	3.14344	0.95004	10.3085	2.03e-08	0.000311
MSTRG.26594	MLOC_62978	5H	19842073	19846557	-1.94273	5.40659	-9.74231	4.42e-08	0.000451
MSTRG.28505	MLOC_72489	5H	179733646	179736907	1.38358	5.27901	9.40521	7.14e-08	0.000546
MSTRG.44690		7H	570271809	570274117	2.97562	-1.46793	8.04917	5.59e-07	0.00317235
MSTRG.44681	MLOC_57585	7H	569716111	569721057	2.03063	6.83395	7.93909	6.67e-07	0.00317235
MSTRG.2760	MLOC_54790	1H	308938797	308940068	4.0001	3.54949	7.88666	7.26e-07	0.00317235
MSTRG.6749		2H	36503642	36505061	1.63434	1.0967	7.19121	2.31e-06	0.00826487
MSTRG.6210	MLOC_1260	2H	7962408	7964264	3.95071	-0.211994	7.06714	2.86e-06	0.00826487
MSTRG.10250		2H	530403290	530404172	2.6081	3.18504	7.06182	2.89e-06	0.00826487
MSTRG.7653	MLOC_11838	2H	232819209	232822068	2.01602	3.69391	7.04504	2.97e-06	0.00826487
MSTRG.31009	MLOC_50968	5H	486131265	486133992	1.71154	2.60206	6.9759	3.35e-06	0.00832085
MSTRG.23353	MLOC_74282	4H	306353587	306355887	1.49695	0.853649	6.89517	3.86e-06	0.00832085
MSTRG.39761	MLOC_37167	7H	22263804	22310471	-4.56804	2.31665	-6.88893	3.9e-06	0.00832085
MSTRG.26701	MLOC_16950	5H	32045808	32046894	3.9547	6.35356	6.86323	4.08e-06	0.00832085
MSTRG.12351		2H	606353759	606355046	-1.58338	0.71506	-6.61945	6.28e-06	0.0109706
MSTRG.6802	MLOC_36363	2H	40118813	40120408	4.65157	1.5452	6.51869	7.53e-06	0.0109706
MSTRG.4007		1H	428417475	428418457	1.32454	0.209918	6.43132	8.82e-06	0.0122646
MSTRG.7917	MLOC_55525	2H	408462332	408465102	-1.82023	2.3984	-6.37404	9.78e-06	0.0130193
MSTRG.37424	MLOC_62430	6H	464665142	464666059	3.18522	-1.4431	6.33231	1.06e-05	0.013389
MSTRG.24670	MLOC_57462	4H	501235168	501238590	2.42705	-1.2522	6.30752	1.1e-05	0.013389
MSTRG.42186		7H	271552873	271554622	2.49409	0.406396	6.24427	1.24e-05	0.0140268
MSTRG.44647	MLOC_53958	7H	566170266	566173320	2.26146	-1.208	6.22602	1.28e-05	0.0140268
MSTRG.4691		1H	456850040	456851247	-3.55098	-1.50769	-6.20575	1.33e-05	0.0140591
MSTRG.39805		7H	24921621	24922713	-4.58791	0.992436	-6.14787	1.48e-05	0.0151259
MSTRG.24490	MLOC_70158	4H	488664822	488666564	2.03196	3.38289	6.09952	1.62e-05	0.0160129
MSTRG.18627	MLOC_3645	3H	503839820	503842108	2.83324	1.7848	6.02319	1.87e-05	0.0163636
MSTRG.19683	MLOC_79868	3H	556785275	556785749	2.012	0.509354	6.02284	1.87e-05	0.0163636
MSTRG.2774	MLOC_73684	1H	309135533	309138458	1.0312	0.793855	5.93863	2.19e-05	0.0174391
MSTRG.32435	MLOC_70842	5H	543286555	543287891	2.36558	-1.41493	5.91157	2.31e-05	0.0174391
MSTRG.4740	MLOC_81871	1H	458202279	458204366	2.42762	0.0755121	5.91105	2.31e-05	0.0174391
MSTRG.30127	MLOC_40020	5H	437578739	437579903	-1.40934	1.08579	-5.90919	2.32e-05	0.0174391
MSTRG.24192	MLOC_63275	4H	447447955	447450280	1.10201	5.96415	5.87376	2.48e-05	0.0174391
MSTRG.9308	MLOC_13104	2H	475724633	475726552	-3.60001	3.82955	-5.86821	2.5e-05	0.0174391
MSTRG.30849		5H	480492611	480492735	-1.23526	1.94778	-5.86464	2.52e-05	0.0174391
MSTRG.43122	MLOC_36919	7H	360541305	360544493	2.01589	-0.650064	5.85107	2.59e-05	0.0174391
MSTRG.27368		5H	79945573	79946836	2.07309	1.0929	5.84395	2.62e-05	0.0174391
MSTRG.19337	MLOC_13908	3H	538096842	538098495	3.83478	-1.10198	5.83954	2.64e-05	0.0174391
MSTRG.44594		7H	563123578	563124350	1.60081	1.71091	5.82141	2.74e-05	0.0174391
MSTRG.13830		3H	8913899	8914451	1.7882	0.698468	5.77951	2.96e-05	0.0181293
MSTRG.42780		7H	329580684	329581403	1.59937	-1.67661	5.74502	3.16e-05	0.0186425
MSTRG.16416		3H	376696186	376697842	2.23152	-0.615544	5.74428	3.17e-05	0.0186425
MSTRG.32560	MLOC_5439	5H	549371194	549372944	3.10764	0.419774	5.70978	3.38e-05	0.0191748
MSTRG.15976	MLOC_61831	3H	365965904	365974701	1.14963	2.93355	5.68882	3.52e-05	0.01935
MSTRG.36945	MLOC_60168	6H	412454172	412458108	1.62707	2.90199	5.68603	3.54e-05	0.01935
MSTRG.40542		7H	90637333	90638079	2.66812	-2.29123	5.64421	3.84e-05	0.0205987
MSTRG.17924		3H	456892734	456893598	2.67546	0.27413	5.62265	4e-05	0.0208368
MSTRG.39809	MLOC_5665	7H	25146404	25146853	1.9714	-0.0107797	5.61685	4.04e-05	0.0208368
MSTRG.9459	MLOC_34619	2H	483888836	483890332	2.78825	0.084525	5.61156	4.08e-05	0.0208368
MSTRG.8468		2H	436079272	436080633	-1.75595	1.39881	-5.56878	4.44e-05	0.0222543
MSTRG.30260	MLOC_61924	5H	444510564	444512753	2.07447	-0.453155	5.55216	4.58e-05	0.0222543
MSTRG.37207		6H	446559276	446560600	1.1597	0.798277	5.50583	5.01e-05	0.0231334
MSTRG.12023		2H	590017802	590020161	-3.30205	2.07941	-5.4931	5.14e-05	0.0231334
MSTRG.21468	MLOC_64685	4H	139271133	139274563	2.67694	8.20821	5.48358	5.23e-05	0.0231334
gene:MLOC_60587	MLOC_60587	2H	578457397	578470675	1.78113	-0.000263	5.47791	5.29e-05	0.0231334
MSTRG.6872	MLOC_55663	2H	45887892	45889505	3.07016	4.88718	5.47781	5.29e-05	0.0231334
MSTRG.12888		2H	625473691	625474112	5.32669	-2.12124	5.44238	5.67e-05	0.0240952
MSTRG.425		1H	19266004	19271183	1.67805	5.37335	5.42195	5.9e-05	0.0247306
MSTRG.40489	MLOC_8139	7H	84206108	84206859	1.00733	3.19628	5.40492	6.1e-05	0.0252204
MSTRG.34119		6H	47602766	47603314	-2.37861	-2.06004	-5.38846	6.3e-05	0.025357
MSTRG.15797	MLOC_54606	3H	353259065	353261433	1.95267	0.682679	5.38469	6.34e-05	0.025357
MSTRG.27115		5H	62528305	62529251	-1.56414	1.72212	-5.38124	6.39e-05	0.025357
MSTRG.44095	MLOC_13204	7H	533315344	533318093	-2.51389	3.11357	-5.33711	6.96e-05	0.0263576
MSTRG.16814		3H	407790746	407791297	1.86225	-0.232509	5.33618	6.98e-05	0.0263576
MSTRG.3450	MLOC_71021	1H	383645364	383647364	4.00691	1.13794	5.31338	7.3e-05	0.0272278
MSTRG.3749		1H	413688014	413689295	2.53561	2.25913	5.29747	7.53e-05	0.0277381
MSTRG.37249	MLOC_58678	6H	448968381	448972361	1.05148	1.82059	5.26562	8.01e-05	0.0283922
MSTRG.37488		6H	471390260	471391114	1.70471	-1.22727	5.25636	8.16e-05	0.0283922
MSTRG.16239	MLOC_211	3H	371382111	371383338	1.84765	-0.784228	5.2562	8.16e-05	0.0283922
MSTRG.11658	MLOC_13009	2H	579508462	579511920	3.02848	5.53881	5.21961	8.77e-05	0.0293087
MSTRG.12297	MLOC_52569	2H	603568722	603570632	2.00304	-1.90563	5.21809	8.8e-05	0.0293087
MSTRG.17370	MLOC_7422	3H	429161408	429162048	-1.49134	-1.4176	-5.21805	8.8e-05	0.0293087
MSTRG.33497	MLOC_8028	6H	5087380	5089205	3.42168	-1.95192	5.17718	9.54e-05	0.0303385
MSTRG.24986	MLOC_12009	4H	519520124	519526895	1.61412	5.32787	5.17648	9.56e-05	0.0303385
MSTRG.11981		2H	589100628	589101819	-3.69301	0.776862	-5.17611	9.56e-05	0.0303385
MSTRG.16791	MLOC_21654	3H	406464961	406467656	1.56889	3.45367	5.1708	9.66e-05	0.0303385
MSTRG.24436	MLOC_15171	4H	481667551	481668750	1.53808	3.55198	5.16454	9.79e-05	0.0303385
MSTRG.32778	MLOC_32569	5H	559331751	559333707	2.46837	4.02518	5.16376	9.8e-05	0.0303385
MSTRG.12817		2H	623742710	623743251	5.02552	-2.39973	5.16306	9.81e-05	0.0303385
MSTRG.4251		1H	435786064	436191924	-2.39715	3.09163	-5.15771	9.92e-05	0.030355
MSTRG.14326	MLOC_22463	3H	36412750	36414865	1.37183	2.31766	5.1508	0.000101	0.0304692
MSTRG.4561		1H	455101668	455104921	2.39216	0.38379	5.14208	0.000102	0.0306971
MSTRG.30771	MLOC_74265	5H	478346055	478570384	-1.07696	5.91277	-5.13071	0.000105	0.031093
MSTRG.15014	MLOC_81303	3H	142412259	142412864	3.21078	0.999881	5.11473	0.000108	0.031788
MSTRG.30159	MLOC_44441	5H	442089791	442091666	-1.16428	2.74482	-5.09426	0.000113	0.0322162
MSTRG.44484		7H	558546047	558549347	-1.51431	7.87194	-5.08629	0.000114	0.0322162
MSTRG.19283		3H	537145455	537146139	1.42448	-1.46699	5.075	0.000117	0.0322162
MSTRG.34383		6H	64581697	64583452	-1.07295	2.32817	-5.06654	0.000119	0.0322162
MSTRG.19712		3H	557107913	557108248	2.57518	2.52582	5.05571	0.000121	0.0322162
MSTRG.36635	MLOC_11331	6H	358650249	358651753	-1.70017	2.6977	-5.05237	0.000122	0.0322162
MSTRG.19568		3H	549924476	549925082	1.49922	-0.757243	5.05217	0.000122	0.0322162
MSTRG.27629		5H	87368808	87370817	1.00017	-0.956091	5.05151	0.000123	0.0322162
MSTRG.32188		5H	535206237	535206489	1.04875	-1.27177	5.02761	0.000129	0.0323292
MSTRG.15489		3H	271965793	271966544	1.61751	1.33055	5.02301	0.00013	0.0323292
MSTRG.6770		2H	38167193	38167722	1.25932	-1.45484	5.02175	0.00013	0.0323292
MSTRG.19338		3H	538137879	538139489	1.63224	6.82341	5.01571	0.000132	0.0323292
MSTRG.1290	MLOC_58690	1H	129358954	129363065	1.36672	2.85902	5.01402	0.000132	0.0323292
MSTRG.8318	MLOC_72858	2H	429783971	429785223	1.04756	3.96878	5.00234	0.000135	0.0324337
MSTRG.2487	MLOC_78260	1H	275451994	275454685	-2.24075	5.62054	-4.99369	0.000138	0.0324337
MSTRG.17434		3H	430731068	430732120	1.85556	-0.433944	4.98898	0.000139	0.0324337
MSTRG.30861	MLOC_55919	5H	480999805	481006965	2.61025	-1.73771	4.96913	0.000144	0.0333965
gene:MLOC_43280	MLOC_43280	5H	180013369	180015748	1.01019	0.461159	4.94268	0.000152	0.0340301
MSTRG.21135	MLOC_18654	4H	42915430	42916023	1.68096	0.955911	4.89653	0.000167	0.0364929
MSTRG.33694		6H	14490959	14493448	1.68461	2.7708	4.88535	0.000171	0.0365867
MSTRG.29302		5H	360313640	360315047	3.57534	3.3937	4.86251	0.000179	0.037772
MSTRG.45355	MLOC_69078	7H	599958354	599962176	1.86074	3.91869	4.85255	0.000183	0.037772
MSTRG.20987	MLOC_57218	4H	27537013	27539637	1.63655	4.67544	4.837	0.000188	0.0382992
MSTRG.32156		5H	533609038	533612641	1.87059	0.625219	4.83569	0.000189	0.0382992
MSTRG.18485	MLOC_61339	3H	496420360	496425367	1.26282	5.76026	4.82232	0.000194	0.0387817
MSTRG.9590	MLOC_56998	2H	493303994	493307967	3.40838	-0.189203	4.81975	0.000195	0.0387817
MSTRG.20988	MLOC_72638	4H	27546682	27547683	-1.10761	2.74061	-4.80081	0.000203	0.0390294
MSTRG.14678		3H	58752137	58753235	1.39405	1.30013	4.78496	0.000209	0.0400498
MSTRG.23174		4H	289648934	289649666	2.72203	-1.48954	4.7754	0.000213	0.040579
MSTRG.19633	MLOC_52070	3H	553088427	553493800	3.05181	4.44503	4.76964	0.000216	0.0406418
MSTRG.25519		4H	543739034	543741111	4.49993	-1.73015	4.76855	0.000216	0.0406418
MSTRG.17522		3H	432884163	432886215	1.06539	3.85584	4.75918	0.000221	0.0409137
MSTRG.6570		2H	20368404	20368984	1.59851	1.52149	4.75627	0.000222	0.0409137
MSTRG.812	MLOC_58100	1H	61930071	61933332	1.02225	2.17973	4.75313	0.000223	0.0409286
MSTRG.40507	MLOC_64254	7H	88617434	88621703	-1.25233	6.48553	-4.73872	0.00023	0.0413987
MSTRG.2555	MLOC_61818	1H	284329846	284334509	-1.26615	6.48455	-4.7292	0.000234	0.0415795
MSTRG.25293	MLOC_5021	4H	533453286	533459057	-1.17423	4.7164	-4.72744	0.000235	0.0415795
MSTRG.33402	MLOC_46472, MLOC_28125, MLOC_13608	6H	29673	268851	2.67137	1.06082	4.72513	0.000236	0.0415795
MSTRG.38472	MLOC_58163	6H	530782286	530958982	2.28959	5.28446	4.71644	0.000241	0.0418391
MSTRG.4024	MLOC_66415	1H	428647812	428697328	1.90566	10.6868	4.71173	0.000243	0.0420027
MSTRG.6765		2H	38029779	38030838	1.69979	-0.893494	4.70247	0.000248	0.0421388
MSTRG.22494		4H	248673922	248674709	2.10544	-0.225008	4.69336	0.000252	0.0421388
MSTRG.31786		5H	518129262	518131992	1.42049	-0.656796	4.69288	0.000252	0.0421388
gene:MLOC_75827	MLOC_75827	5H	132426143	132429247	2.42057	-1.5519	4.69275	0.000252	0.0421388
MSTRG.11579	MLOC_29498	2H	575704748	575706016	4.08224	-1.29386	4.6857	0.000256	0.0421388
MSTRG.43177		7H	404965066	404966859	1.33555	5.30242	4.68331	0.000257	0.0421388
MSTRG.24639		4H	499083090	499123062	1.45008	4.54767	4.68269	0.000258	0.0421388
MSTRG.32529		5H	548437622	548438116	2.32714	0.823415	4.6805	0.000259	0.0421388
MSTRG.23907		4H	416800531	416801796	2.6409	-0.286626	4.67444	0.000262	0.0424364
MSTRG.45268		7H	595628991	595631259	2.57428	-0.42787	4.65913	0.00027	0.0430821
MSTRG.31490	MLOC_63969	5H	506324567	506327901	1.76648	4.64637	4.64893	0.000276	0.0435493
MSTRG.32025	MLOC_80912	5H	528302034	528305319	1.17744	2.68315	4.63189	0.000286	0.0436244
MSTRG.18414	MLOC_19670	3H	489725374	489727559	1.06771	1.39865	4.62913	0.000287	0.0436244
MSTRG.37668		6H	482672184	482675879	-1.69708	2.42732	-4.62748	0.000288	0.0436244
gene:MLOC_70409	MLOC_70409	3H	424149321	424151862	1.9169	-1.45982	4.62672	0.000289	0.0436244
MSTRG.23921	MLOC_10899	4H	417627494	417629292	3.7662	-0.200115	4.62271	0.000291	0.0436244
MSTRG.43641		7H	472921291	472922151	1.56753	-0.825441	4.61764	0.000294	0.0436244
MSTRG.35458	MLOC_10990	6H	237984258	237985595	1.83046	2.54494	4.61699	0.000295	0.0436244
MSTRG.10717	MLOC_69129	2H	546434355	546434775	-2.26648	-0.628711	-4.61114	0.000298	0.0438744
MSTRG.22621	MLOC_39183	4H	253291250	253293308	2.28138	-0.584063	4.58441	0.000315	0.0459956
MSTRG.30488	MLOC_65161	5H	457039799	457044219	1.22244	0.205456	4.57644	0.00032	0.0459956
MSTRG.39357	MLOC_74611	7H	4736698	4737814	-2.54542	0.7522	-4.57085	0.000324	0.0459956
MSTRG.3444		1H	383304475	383306043	1.74607	-0.692776	4.57077	0.000324	0.0459956
MSTRG.10806	MLOC_11562	2H	548557768	548558756	-1.01641	4.81052	-4.5706	0.000324	0.0459956
MSTRG.37845	MLOC_5716	6H	498140223	498142706	1.74538	4.97756	4.57038	0.000324	0.0459956
MSTRG.29627		5H	386207007	386208218	-2.11459	0.600692	-4.56786	0.000326	0.0459956
MSTRG.15822	MLOC_71129	3H	353972359	353974145	1.31025	0.0611312	4.55351	0.000335	0.0468221
MSTRG.40851	MLOC_72166	7H	118419391	118420912	2.14416	-0.89442	4.55158	0.000337	0.0468221
MSTRG.12898	MLOC_43077	2H	626365965	626366451	5.52761	-1.7212	4.54972	0.000338	0.0468221
MSTRG.37751	MLOC_76480	6H	492323674	492325584	1.4946	2.58111	4.5301	0.000352	0.0485239
MSTRG.28162		5H	121195215	121195812	1.1288	-0.949659	4.51111	0.000366	0.0494961
MSTRG.18386	MLOC_37763	3H	487546601	487555710	2.18678	5.82998	4.50434	0.000371	0.0496441
MSTRG.37084		6H	430802820	430803293	-1.0998	-0.735319	-4.50326	0.000372	0.0496441
MSTRG.3601		1H	403988593	403988720	-1.94638	-1.59064	-4.50172	0.000373	0.0496441

## Sheet: GO_DEgenes_down_BP
REVIGO analysis for GO enrichment from salt-induced downregulated genes in roots: biological process (BP)
term_ID	description	frequency	plot_X	plot_Y	plot_size	log10 p-value	uniqueness	dispensability	representative	eliminated
GO:0006518	peptide metabolic process	0.00323	-5.269	-5.39	5.206	-18.2118	0.621	0	6518	0
GO:0006091	generation of precursor metabolites and energy	0.03224	-0.935	7.355	6.205	-2.2823	0.77	0.062	6091	0
GO:1901564	organonitrogen compound metabolic process	0.19565	-0.819	-4.342	6.988	-30.1791	0.554	0.158	1901564	0
GO:0044260	cellular macromolecule metabolic process	0.28588	2.065	0.872	7.153	-23.8297	0.576	0.175	44260	0
GO:0043170	macromolecule metabolic process	0.32799	4.252	-4.359	7.213	-23.8297	0.714	0.214	43170	0
GO:0006725	cellular aromatic compound metabolic process	0.33051	-3.602	4.004	7.216	-2.9779	0.7	0.242	6725	0
GO:0009123	nucleoside monophosphate metabolic process	0.06477	-4.177	-2.248	6.508	-4.1925	0.342	0.267	9123	0
GO:0009144	purine nucleoside triphosphate metabolic process	0.06477	null	null	6.508	-2.0616	0.342	0.761	9123	1
GO:0046128	purine ribonucleoside metabolic process	0.0732	null	null	6.561	-4.1925	0.301	0.741	9123	1
GO:0009117	nucleotide metabolic process	0.09829	null	null	6.689	-4.0788	0.309	0.824	9123	1
GO:0009150	purine ribonucleotide metabolic process	0.07456	null	null	6.569	-4.0788	0.291	0.889	9123	1
GO:0042278	purine nucleoside metabolic process	0.07358	null	null	6.564	-2.8463	0.3	0.89	9123	1
GO:0009167	purine ribonucleoside monophosphate metabolic process	0.06007	null	null	6.475	-2.8052	0.348	0.751	9123	1
GO:0006163	purine nucleotide metabolic process	0.07644	null	null	6.58	-3.2904	0.289	0.896	9123	1
GO:0044271	cellular nitrogen compound biosynthetic process	0.15794	-2.982	-1.194	6.895	-26.9788	0.465	0.335	44271	0
GO:1901566	organonitrogen compound biosynthetic process	0.09297	-2.379	-3.507	6.665	-25.0191	0.453	0.394	1901566	0
GO:0044267	cellular protein metabolic process	0.08784	3.516	2.147	6.64	-22.4881	0.635	0.407	44267	0
GO:0034641	cellular nitrogen compound metabolic process	0.33428	-3.984	-0.007	7.221	-29.3665	0.519	0.428	34641	0
GO:0019538	protein metabolic process	0.12328	5.308	0.694	6.788	-22.4881	0.668	0.448	19538	0
GO:0010467	gene expression	0.16702	5.431	-0.401	6.92	-13.0453	0.674	0.493	10467	0
GO:0006139	nucleobase-containing compound metabolic process	0.29917	-1.176	-1.147	7.173	-3.2327	0.433	0.507	6139	0
GO:1901576	organic substance biosynthetic process	0.28886	1.614	-3.005	7.157	-17.7375	0.61	0.539	1901576	0
GO:0044249	cellular biosynthetic process	0.28205	-2.495	1.792	7.147	-11.3936	0.601	0.663	44249	0

## Sheet: GO_DEgenes_down_CC
REVIGO analysis for GO enrichment from salt-induced downregulated genes in roots: cellular components (CC)
term_ID	description	frequency	plot_X	plot_Y	plot_size	log10 p-value	uniqueness	dispensability	representative	eliminated
GO:0009536	plastid	0.01594	4.63	-2.483	5.573	-55.2733	0.371	0	9536	0
GO:0009579	thylakoid	0.00411	-4.11	2.862	4.985	-13.7011	0.65	0.097	9579	0
GO:0044444	cytoplasmic part	0.13606	0.708	-5.526	6.505	-55.2733	0.555	0.194	44444	0
GO:0030529	ribonucleoprotein complex	0.06088	-2.587	-5.051	6.155	-18.2118	0.555	0.195	30529	0
GO:0005737	cytoplasm	0.38159	-0.692	-2.595	6.952	-49.4342	0.56	0.316	5737	0
GO:0031984	organelle subcompartment	0.00233	5.505	0.235	4.738	-9.2676	0.434	0.428	31984	0
GO:0043232	intracellular non-membrane-bounded organelle	0.07682	2.789	-1.963	6.256	-14.109	0.386	0.464	43232	0
GO:0009507	chloroplast	0.01445	4.546	-1.447	5.531	-16.5086	0.336	0.528	9507	0
GO:0009521	photosystem	0.00214	null	null	4.701	-3.8777	0.405	0.892	9507	1
GO:0044436	thylakoid part	0.00397	null	null	4.97	-12.067	0.423	0.939	9507	1
GO:0009534	chloroplast thylakoid	0.00218	null	null	4.71	-16.5086	0.222	0.786	9507	1
GO:0043231	intracellular membrane-bounded organelle	0.08847	3.123	-1.295	6.318	-54.2733	0.308	0.666	43231	0

## Sheet: GO_DEgenes_up_BP
REVIGO analysis for GO enrichment from salt-induced upregulated genes in roots: biological process (BP)
term_ID	description	frequency	plot_X	plot_Y	plot_size	log10 p-value	uniqueness	dispensability	representative	eliminated
GO:0006518	peptide metabolic process	0.00323	-6.726	-2.594	5.206	-44.7825	0.71	0	6518	0
GO:0043604	amide biosynthetic process	0.00553	null	null	5.439	-36.0414	0.66	0.852	6518	1
GO:0043043	peptide biosynthetic process	0.00209	null	null	5.017	-43.7235	0.642	0.782	6518	1
GO:0015672	monovalent inorganic cation transport	0.02709	3.473	-3.757	6.13	-13.6108	0.756	0	15672	0
GO:0015992	proton transport	0.01974	null	null	5.992	-14.1726	0.758	0.822	15672	1
GO:0006812	cation transport	0.03981	null	null	6.297	-11.4535	0.757	0.775	15672	1
GO:0098662	inorganic cation transmembrane transport	0.02309	null	null	6.06	-9.6635	0.691	0.839	15672	1
GO:0098655	cation transmembrane transport	0.02858	null	null	6.153	-3.93	0.687	0.864	15672	1
GO:0098660	inorganic ion transmembrane transport	0.02581	null	null	6.108	-6.2865	0.695	0.728	15672	1
GO:1902600	hydrogen ion transmembrane transport	0.01797	null	null	5.951	-12.0273	0.695	0.969	15672	1
GO:0015985	energy coupled proton transport, down electrochemical gradient	0.0045	null	null	5.35	-13.1355	0.735	0.825	15672	1
GO:0015979	photosynthesis	0.00343	5.598	-1.296	5.232	-35.4248	0.885	0.05	15979	0
GO:0036211	protein modification process	0.02895	3.152	7.103	6.158	-7.1851	0.821	0.054	36211	0
GO:0006091	generation of precursor metabolites and energy	0.03224	5.54	0.74	6.205	-30.3063	0.853	0.063	6091	0
GO:0022900	electron transport chain	0.01163	-1.975	-5.561	5.763	-26.2	0.768	0.072	22900	0
GO:0006119	oxidative phosphorylation	0.01167	null	null	5.764	-2.7248	0.404	0.747	22900	1
GO:0090407	organophosphate biosynthetic process	0.04455	-6.711	2.306	6.346	-13.6108	0.5	0.087	90407	0
GO:0043170	macromolecule metabolic process	0.32799	2.441	5.304	7.213	-76.1421	0.812	0.12	43170	0
GO:0046483	heterocycle metabolic process	0.33326	0.74	0.749	7.22	-40.0878	0.784	0.136	46483	0
GO:0043603	cellular amide metabolic process	0.0091	-5.212	-2.723	5.656	-11.4034	0.769	0.14	43603	0
GO:1901135	carbohydrate derivative metabolic process	0.11649	4.961	3.808	6.763	-14.3768	0.844	0.155	1901135	0
GO:0055114	oxidation-reduction process	0.15044	-3.924	-5.141	6.874	-22.9208	0.77	0.177	55114	0
GO:1901564	organonitrogen compound metabolic process	0.19565	-2.407	6.602	6.988	-70.3915	0.698	0.184	1901564	0
GO:0006793	phosphorus metabolic process	0.16891	2.561	0.677	6.924	-23.9136	0.811	0.198	6793	0
GO:1901360	organic cyclic compound metabolic process	0.33913	1.618	6.153	7.227	-30.0376	0.81	0.23	1901360	0
GO:1901659	glycosyl compound biosynthetic process	0.01692	-8.102	1.363	5.925	-12.7212	0.537	0.246	1901659	0
GO:0046129	purine ribonucleoside biosynthetic process	0.01074	null	null	5.728	-8.3969	0.405	0.905	1901659	1
GO:0006164	purine nucleotide biosynthetic process	0.01468	null	null	5.864	-12.3565	0.366	0.93	1901659	1
GO:0042455	ribonucleoside biosynthetic process	0.01646	null	null	5.913	-12.7212	0.394	0.932	1901659	1
GO:0009152	purine ribonucleotide biosynthetic process	0.01378	null	null	5.836	-5.9208	0.349	0.958	1901659	1
GO:0009163	nucleoside biosynthetic process	0.01665	null	null	5.918	-10.7447	0.394	0.978	1901659	1
GO:0006754	ATP biosynthetic process	0.00464	null	null	5.363	-11.2007	0.383	0.822	1901659	1
GO:0042451	purine nucleoside biosynthetic process	0.01074	null	null	5.728	-12.7212	0.406	0.723	1901659	1
GO:0009201	ribonucleoside triphosphate biosynthetic process	0.0059	null	null	5.467	-7.2487	0.439	0.945	1901659	1
GO:0006725	cellular aromatic compound metabolic process	0.33051	0.549	0.153	7.216	-39.068	0.785	0.259	6725	0
GO:0072522	purine-containing compound biosynthetic process	0.01594	-6.852	2.936	5.899	-13.6108	0.552	0.266	72522	0
GO:0019538	protein metabolic process	0.12328	0.51	7.979	6.788	-57.5751	0.786	0.266	19538	0
GO:0043412	macromolecule modification	0.05091	2.211	7.935	6.404	-8.9431	0.828	0.295	43412	0
GO:0055086	nucleobase-containing small molecule metabolic process	0.10836	-3.627	0.671	6.732	-4.8153	0.508	0.303	55086	0
GO:0044281	small molecule metabolic process	0.215	-4.06	-5.185	7.029	-22.3747	0.756	0.328	44281	0
GO:0097659	nucleic acid-templated transcription	0.00772	-4.678	5.511	5.584	-2.924	0.621	0.349	97659	0
GO:0044249	cellular biosynthetic process	0.28205	-5.729	3.652	7.147	-78.6198	0.634	0.38	44249	0
GO:0034641	cellular nitrogen compound metabolic process	0.33428	-2.101	1.221	7.221	-64.8665	0.656	0.428	34641	0
GO:0044260	cellular macromolecule metabolic process	0.28588	-0.171	5.591	7.153	-57.3125	0.709	0.448	44260	0
GO:1901566	organonitrogen compound biosynthetic process	0.09297	-5.963	3.804	6.665	-60.7721	0.576	0.457	1901566	0
GO:0006818	hydrogen transport	0.01975	3.449	-3.925	5.992	-8.9706	0.804	0.481	6818	0
GO:0010467	gene expression	0.16702	0.75	7.769	6.92	-54.5391	0.791	0.493	10467	0
GO:0044711	single-organism biosynthetic process	0.12458	-7.275	1.047	6.792	-14.8239	0.651	0.497	44711	0
GO:0006139	nucleobase-containing compound metabolic process	0.29917	-2.211	3.313	7.173	-40.0878	0.565	0.507	6139	0
GO:1901137	carbohydrate derivative biosynthetic process	0.03915	-8.23	3.848	6.29	-8.5031	0.608	0.519	1901137	0
GO:0090304	nucleic acid metabolic process	0.20158	-1.824	4.515	7.001	-10.6478	0.54	0.528	90304	0
GO:0019438	aromatic compound biosynthetic process	0.15562	-5.429	3.281	6.889	-18.8297	0.581	0.532	19438	0
GO:0044271	cellular nitrogen compound biosynthetic process	0.15794	-4.986	2.654	6.895	-38.3726	0.57	0.534	44271	0
GO:0072521	purine-containing compound metabolic process	0.08058	-3.237	2.282	6.603	-23.0721	0.596	0.536	72521	0
GO:0018130	heterocycle biosynthetic process	0.1615	-5.462	3.057	6.905	-21.8069	0.58	0.538	18130	0
GO:1901362	organic cyclic compound biosynthetic process	0.16583	-5.558	4.581	6.916	-16.5157	0.594	0.543	1901362	0
GO:0034645	cellular macromolecule biosynthetic process	0.172	-3.252	5.125	6.932	-49.7077	0.602	0.55	34645	0
GO:0009059	macromolecule biosynthetic process	0.17669	-3.9	6.053	6.944	-41.8041	0.643	0.554	9059	0
GO:0009165	nucleotide biosynthetic process	0.0278	-5.229	1.289	6.141	-13.1355	0.358	0.558	9165	0
GO:1901293	nucleoside phosphate biosynthetic process	0.02826	null	null	6.148	-12.0273	0.37	0.832	9165	1
GO:0009260	ribonucleotide biosynthetic process	0.01766	null	null	5.944	-4.9101	0.354	0.91	9165	1
GO:0009127	purine nucleoside monophosphate biosynthetic process	0.01098	null	null	5.737	-8.1918	0.404	0.936	9165	1
GO:0009142	nucleoside triphosphate biosynthetic process	0.00673	null	null	5.525	-3.8525	0.436	0.808	9165	1
GO:0009156	ribonucleoside monophosphate biosynthetic process	0.01445	null	null	5.857	-12.7212	0.388	0.886	9165	1
GO:0034654	nucleobase-containing compound biosynthetic process	0.13019	-4.412	3.364	6.811	-24.6162	0.493	0.559	34654	0
GO:0019637	organophosphate metabolic process	0.11968	0.765	1.987	6.775	-23.9136	0.561	0.565	19637	0
GO:0006796	phosphate-containing compound metabolic process	0.16693	null	null	6.919	-11.1135	0.564	0.755	19637	1
GO:0019684	photosynthesis, light reaction	0.00085	1.38	-5.08	4.627	-17.1158	0.876	0.577	19684	0
GO:0016310	phosphorylation	0.063	-0.99	-2.26	6.496	-4.4023	0.622	0.605	16310	0
GO:0044267	cellular protein metabolic process	0.08784	0.114	7.135	6.64	-59.0701	0.751	0.614	44267	0
GO:0044765	single-organism transport	0.12592	1.036	-5.101	6.797	-13.6108	0.753	0.633	44765	0
GO:0055085	transmembrane transport	0.09397	null	null	6.67	-14.1726	0.682	0.811	44765	1
GO:0006810	transport	0.17382	null	null	6.937	-11.2007	0.857	0.753	44765	1
GO:0009167	purine ribonucleoside monophosphate metabolic process	0.06007	-3.959	0.036	6.475	-22.3747	0.368	0.652	9167	0
GO:0046128	purine ribonucleoside metabolic process	0.0732	null	null	6.561	-21.2457	0.345	0.73	9167	1
GO:0042278	purine nucleoside metabolic process	0.07358	null	null	6.564	-21.2457	0.347	0.891	9167	1
GO:0009205	purine ribonucleoside triphosphate metabolic process	0.06477	null	null	6.508	-23.9136	0.364	0.761	9167	1
GO:0009116	nucleoside metabolic process	0.08228	null	null	6.612	-19.2358	0.348	0.909	9167	1
GO:0009117	nucleotide metabolic process	0.09829	null	null	6.689	-22.3747	0.342	0.857	9167	1
GO:0009119	ribonucleoside metabolic process	0.07925	null	null	6.596	-22.3747	0.351	0.89	9167	1
GO:0009259	ribonucleotide metabolic process	0.07844	null	null	6.591	-23.9136	0.336	0.789	9167	1
GO:0009123	nucleoside monophosphate metabolic process	0.06477	null	null	6.508	-23.9136	0.377	0.751	9167	1
GO:0009126	purine nucleoside monophosphate metabolic process	0.06008	null	null	6.476	-5.3036	0.369	0.919	9167	1
GO:0019693	ribose phosphate metabolic process	0.07902	null	null	6.595	-20.7696	0.439	0.755	9167	1
GO:0006163	purine nucleotide metabolic process	0.07644	null	null	6.58	-20.7696	0.336	0.894	9167	1
GO:0009144	purine nucleoside triphosphate metabolic process	0.06477	null	null	6.508	-10.8633	0.365	0.922	9167	1
GO:0009141	nucleoside triphosphate metabolic process	0.06724	null	null	6.524	-7.9245	0.374	0.795	9167	1
GO:0009150	purine ribonucleotide metabolic process	0.07456	null	null	6.569	-20.7696	0.316	0.909	9167	1
GO:0009161	ribonucleoside monophosphate metabolic process	0.06356	null	null	6.5	-22.3747	0.365	0.919	9167	1
GO:0006753	nucleoside phosphate metabolic process	0.09897	null	null	6.692	-18.618	0.351	0.816	9167	1
GO:0046034	ATP metabolic process	0.05374	null	null	6.427	-18.9172	0.315	0.922	9167	1
GO:1901657	glycosyl compound metabolic process	0.0826	null	null	6.614	-21.2457	0.596	0.744	9167	1
GO:0009199	ribonucleoside triphosphate metabolic process	0.0656	null	null	6.514	-18.3363	0.364	0.922	9167	1
GO:1901576	organic substance biosynthetic process	0.28886	-5.52	5.298	7.157	-42.0052	0.652	0.663	1901576	0

## Sheet: GO_DEgenes_up_CC
REVIGO analysis for GO enrichment from salt-induced upregulated genes in roots: cellular components (CC)
term_ID	description	frequency	plot_X	plot_Y	plot_size	log10 p-value	uniqueness	dispensability	representative	eliminated
GO:0009536	plastid	0.01594	5.557	-1.411	5.573	-198.914	0.43	0	9536	0
GO:0042651	thylakoid membrane	0.00308	-2.103	4.642	4.859	-98.3936	0.383	0.094	42651	0
GO:0044436	thylakoid part	0.00397	null	null	4.97	-76.1561	0.38	0.967	42651	1
GO:0045259	proton-transporting ATP synthase complex	0.00882	null	null	5.316	-12.7212	0.428	1.21	42651	1
GO:0016469	proton-transporting two-sector ATPase complex	0.00995	null	null	5.369	-14.1726	0.518	1.051	42651	1
GO:0009521	photosystem	0.00214	null	null	4.701	-24.1851	0.248	0.927	42651	1
GO:0009523	photosystem II	0.00157	null	null	4.566	-15.7773	0.26	0.903	42651	1
GO:0009579	thylakoid	0.00411	-5.228	-3.107	4.985	-97.5229	0.742	0.097	9579	0
GO:0005737	cytoplasm	0.38159	0.152	-1.784	6.952	-198.914	0.643	0.183	5737	0
GO:0030529	ribonucleoprotein complex	0.06088	1.972	-6.519	6.155	-42.4306	0.535	0.248	30529	0
GO:0044444	cytoplasmic part	0.13606	0.272	-3.776	6.505	-197.602	0.64	0.316	44444	0
GO:0031984	organelle subcompartment	0.00233	6.527	0.087	4.738	-103.979	0.469	0.428	31984	0
GO:0044391	ribosomal subunit	0.01358	4.855	-3.169	5.504	-14.0696	0.315	0.512	44391	0
GO:0009507	chloroplast	0.01445	5.04	-0.381	5.531	-111.824	0.328	0.528	9507	0
GO:0044435	plastid part	0.0028	null	null	4.817	-104.369	0.377	0.805	9507	1
GO:0009534	chloroplast thylakoid	0.00218	null	null	4.71	-80.9031	0.175	0.995	9507	1
GO:0044434	chloroplast part	0.00278	null	null	4.815	-110.427	0.327	0.805	9507	1
GO:0031976	plastid thylakoid	0.00218	null	null	4.71	-103.979	0.175	0.985	9507	1
GO:0055035	plastid thylakoid membrane	0.00212	null	null	4.697	-103.979	0.173	0.974	9507	1
GO:0043232	intracellular non-membrane-bounded organelle	0.07682	3.972	-1.898	6.256	-42.4306	0.416	0.659	43232	0
GO:0005840	ribosome	0.05756	null	null	6.131	-8.4776	0.306	0.835	43232	1
GO:0043231	intracellular membrane-bounded organelle	0.08847	3.952	-1.022	6.318	-189.408	0.362	0.666	43231	0

## Sheet: GO_DEgenes_up_MF
REVIGO analysis for GO enrichment from salt-induced upregulated genes in roots: molecular functions (MF)
term_ID	description	frequency	plot_X	plot_Y	plot_size	log10 p-value	uniqueness	dispensability	representative	eliminated
GO:0022890	inorganic cation transmembrane transporter activity	0.03189	-4.52	-4.066	6.179	-19.3726	0.471	0	22890	0
GO:0008324	cation transmembrane transporter activity	0.03895	null	null	6.265	-9.2676	0.466	0.829	22890	1
GO:0022891	substrate-specific transmembrane transporter activity	0.06719	null	null	6.502	-19.3726	0.465	0.789	22890	1
GO:0015075	ion transmembrane transporter activity	0.05338	null	null	6.402	-10.0343	0.468	0.861	22890	1
GO:0015077	monovalent inorganic cation transmembrane transporter activity	0.02605	null	null	6.091	-17.4191	0.48	0.879	22890	1
GO:0046906	tetrapyrrole binding	0.01906	1.879	-7.149	5.955	-20.8297	0.835	0	46906	0
GO:0050136	NADH dehydrogenase (quinone) activity	0.00783	0.346	6.201	5.569	-14.1726	0.835	0	50136	0
GO:0003954	NADH dehydrogenase activity	0.00792	null	null	5.573	-14.1726	0.835	0.877	50136	1
GO:0042623	ATPase activity, coupled	0.02878	-5.056	1.894	6.134	-10.6478	0.68	0.027	42623	0
GO:0044769	ATPase activity, coupled to transmembrane movement of ions, rotational mechanism	0.00375	null	null	5.249	-10.6478	0.433	0.814	42623	1
GO:0015405	P-P-bond-hydrolysis-driven transmembrane transporter activity	0.02064	null	null	5.99	-9.2668	0.468	0.969	42623	1
GO:0016818	hydrolase activity, acting on acid anhydrides, in phosphorus-containing anhydrides	0.07512	null	null	6.551	-4.3726	0.677	0.778	42623	1
GO:0042626	ATPase activity, coupled to transmembrane movement of substances	0.01903	null	null	5.954	-10.6478	0.38	0.744	42623	1
GO:0042625	ATPase activity, coupled to transmembrane movement of ions	0.00983	null	null	5.667	-10.6478	0.39	0.905	42623	1
GO:0043169	cation binding	0.15811	5.843	1.229	6.874	-26.2	0.821	0.09	43169	0
GO:0003676	nucleic acid binding	0.21746	5.022	-2.88	7.012	-42.4306	0.791	0.18	3676	0
GO:0003723	RNA binding	0.0586	4.049	-5.859	6.443	-24.6021	0.817	0.226	3723	0
GO:0001883	purine nucleoside binding	0.15549	5.159	-4.063	6.867	-8.6021	0.696	0.291	1883	0
GO:0032559	adenyl ribonucleotide binding	0.13953	null	null	6.82	-7.7932	0.702	0.784	1883	1
GO:0032549	ribonucleoside binding	0.1566	null	null	6.87	-5.4377	0.696	0.839	1883	1
GO:0032553	ribonucleotide binding	0.16286	null	null	6.887	-5.6253	0.696	0.817	1883	1
GO:1901265	nucleoside phosphate binding	0.20353	3.91	-3.299	6.983	-11.0255	0.792	0.317	1901265	0
GO:0016651	oxidoreductase activity, acting on NAD(P)H	0.01351	-0.523	6.086	5.805	-6.9914	0.869	0.358	16651	0
GO:0016817	hydrolase activity, acting on acid anhydrides	0.07557	-4.693	2.606	6.553	-3.0328	0.783	0.389	16817	0
GO:0046872	metal ion binding	0.15488	5.178	1.853	6.865	-21.6402	0.797	0.395	46872	0
GO:0016820	hydrolase activity, acting on acid anhydrides, catalyzing transmembrane movement of substances	0.02034	-4.858	-1.433	5.983	-3.9616	0.438	0.642	16820	0
GO:0022853	active ion transmembrane transporter activity	0.00912	-4.445	-4.519	5.635	-8.4976	0.501	0.681	22853	0
GO:0022804	active transmembrane transporter activity	0.0387	-4.83	-3.772	6.263	-6.6716	0.505	0.682	22804	0
GO:0046914	transition metal ion binding	0.07335	5.273	2.847	6.54	-12.7212	0.807	0.694	46914	0

## Sheet: GO_hypoDM_DEgenes
GO enrichment from salt-induced hypomethylated DE genes in roots
term_ID	description	frequency	plot_X	plot_Y	plot_size	log10 p-value	uniqueness	dispensability	representative	eliminated
GO:0009536	plastid	0.01594	2.595	0.021	5.573	-7.7423	0.006	0	9536	0
GO:0044444	cytoplasmic part	0.13606	-2.515	0.642	6.505	-7.2321	0.133	0.194	44444	0
GO:0043231	intracellular membrane-bounded organelle	0.08847	2.148	1.456	6.318	-8.5918	0.011	0.666	43231	0

## Sheet: REVIGO_hyperDM_DEgenes
GO enrichment from salt-induced hypermethylated DE genes in roots
term_ID	description	frequency	plot_X	plot_Y	plot_size	log10 p-value	uniqueness	dispensability	representative	eliminated
GO:0009536	plastid	0.01594	0.821	-0.039	5.573	-5.5626	0.007	0	9536	0
GO:0005737	cytoplasm	0.38159	-0.12	-0.248	6.952	-6.0599	0.213	0.183	5737	0
GO:0043231	intracellular membrane-bounded organelle	0.08847	0.713	-0.431	6.318	-5.935	0.005	0.666	43231	0
